# Supplementary material for: Contrasting life-cycle impacts of stream flow on two Chinook salmon populations
Source: Springer Nature journal article supplement (doi:10.1007/s10750-010-0419-0), 2010-09-07
Supplement: MOESM1 [file 10750_2010_419_MOESM1_ESM.docx]

Appendix 1. AIC analysis of regression models for Lemhi River, Marsh Creek, Snake River, and Columbia river flows. Models shown are a single constant, all single parameter models, and the two- and three- parameter models with the lowest AICc (corrected for small sample size). All models include a constant. The best models are shown in bold, and competing models in italics. Abbreviations: PDO = Pacific Decadal Oscillation, ENSO = El Nino/Southern Oscillation, BY = brood year, O-M = October-March, A-S = April-September, A-J = April-June, R2 = coefficient of determination, N = number of years, K= parameters estimated (including constant and variance), ΔAICc = difference of AICc from best model.

| **River** | **Parameter(s)** | **R2** | **N** | **K** | **ΔAICc** |
| --- | --- | --- | --- | --- | --- |
| Lemhi | **Constant** | **0** | **13** | **2** | **0** |
|  | *PDO by (O-M)* | *0.159* | *13* | *3* | *1.2* |
|  | *ENSO by (O-M)* | *0.114* | *13* | *3* | *1.9* |
|  | ENSO BY+1 (A-S) | 0.012 | 13 | 3 | 3.3 |
|  | PDO by (O-M), PDO BY+1 (A-S) | 0.288 | 13 | 4 | 3.4 |
|  | PDO BY+1 (A-S) | 0.001 | 13 | 3 | 3.5 |
|  | ENSO by (O-M), ENSO BY+1 (A-S) | 0.114 | 13 | 4 | 6.2 |
|  | Full model | 0.367 | 13 | 6 | 14.9 |
|  |  |  |  |  |  |
| Marsh | **PDO BY+1 (A-S)** | **0.315** | **14** | **3** | **0** |
|  | *Constant* | *0* | *14* | *2* | *2.0* |
|  | ENSO BY+1 (A-S) | 0.136 | 14 | 3 | 3.2 |
|  | PDO by (O-M) | 0.122 | 14 | 3 | 3.5 |
|  | PDO by (O-M), PDO BY+1 (A-S) | 0.315 | 14 | 4 | 4.0 |
|  | ENSO by (O-M) | 0.019 | 14 | 3 | 5.0 |
|  | ENSO by (O-M), ENSO BY+1 (A-S) | 0.137 | 14 | 4 | 7.3 |
|  | Full model | 0.382 | 14 | 6 | 14.2 |
|  |  |  |  |  |  |
| Snake | **ENSO BY+1 (O-M)** | **0.055** | **49** | **3** | **0** |
|  | *Constant* | *0* | *49* | *2* | *0.5* |
|  | *ENSO BY+1 (O-M), ENSO BY+2 (A-J)* | *0.055* | *49* | *4* | *2.4* |
|  | *ENSO BY+2 (A-J)* | *0.001* | *49* | *3* | *2.7* |
|  | Full model | 0.102 | 49 | 6 | 5.0 |
|  | *PDO BY+1 (O-M)* | *0.028* | *49* | *3* | *1.4* |
|  | *PDO BY+1 (O-M), PDO BY+2 (A-J)* | *0.046* | *49* | *4* | *2.8* |
|  | *PDO BY+2 (A-J)* | *0.001* | *49* | *3* | *2.7* |
|  |  |  |  |  |  |
| Columbia | **Full model** | **0.706** | **57** | **7** | **0** |
|  | *Snake flow BY+2 (A-J), PDO BY+1 (O-M)* | *0.657* | *57* | *4* | *1.4* |
|  | Snake flow BY+2 (A-J), PDO BY+1 (O-M), PDO BY+2 (A-J) | 0.653 | 57 | 5 | 4.4 |
|  | Snake flow BY+2 (A-J), PDO BY+2 (A-J) | 0.625 | 57 | 4 | 6.5 |
|  | Snake flow BY+2 (A-J) | 0.556 | 57 | 3 | 13.8 |
|  | Snake flow BY+2 (A-J), ENSO BY+1 (O-M) | 0.570 | 57 | 4 | 14.2 |
|  | Snake flow BY+2 (A-J), ENSO BY+2 (A-J) | 0.570 | 57 | 4 | 14.3 |
|  | Snake flow BY+2 (A-J), ENSO BY+1 (O-M), ENSO BY+2 (A-J) | 0.556 | 57 | 5 | 18.5 |
|  | PDO BY+1 (O-M) | 0.304 | 57 | 3 | 57.1 |
|  | Constant | 0 | 57 | 2 | 57.8 |
|  | PDO BY+1 (O-M), PDO BY+2 (A-J) | 0.313 | 57 | 4 | 58.7 |
|  | PDO BY+2 (A-J) | 0.116 | 57 | 3 | 72.2 |
|  | ENSO BY+1 (O-M) | 0.002 | 57 | 3 | 75.8 |
|  | ENSO BY+1 (O-M), ENSO BY+2 (A-J) | 0.012 | 57 | 4 | 77.5 |
|  | ENSO BY+2 (A-J) | 0.003 | 57 | 3 | 79.0 |
